# Supplementary material for: Calibration on force upon the surface of single ZnO nanowire applied by AFM tip with different scanning angles
Source: Royal Society of Chemistry journal article supplement (doi:10.1039/c5ra05954b), 2015-01-01
Supplement: c5ra05954b1.pdf [file c5ra05954b1.pdf]

## **Calibration on force upon the surface of single ZnO nanowire applied by AFM tip with different scanning angles**

**Peifeng Li<sup>a,#</sup>, Qingliang Liao<sup>a,#</sup>, Zengze Wang<sup>a</sup>, Pei Lin<sup>a</sup>, Zheng Zhang<sup>a</sup>, Xiaoqin Yan<sup>a</sup>, Yue Zhang<sup>a,b,\*</sup>**

*<sup>a</sup> State Key Laboratory for Advanced Metals and Materials, School of Materials Science and Engineering, University of Science and Technology Beijing, Beijing 100083, People's Republic of China.; E-mail: yuezhang@ustb.edu.cn*

*<sup>b</sup> Key Laboratory of New Energy Materials and Technologies, University of Science and Technology Beijing, Beijing 100083, People's Republic of China.; E-mail: yuezhang@ustb.edu.cn*

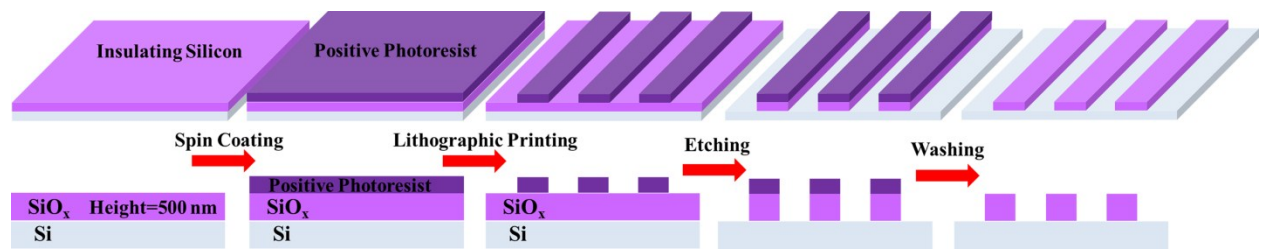

Fig. S1 The production processes of the insulating silicon trench arrays.

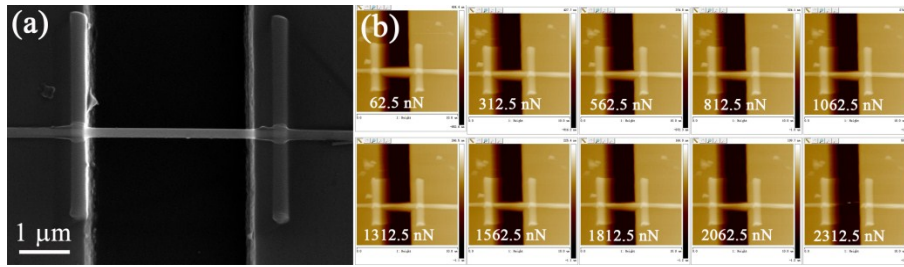

**Fig. S2** (a) SEM images of the ZnO NW with diameter of about 172 nm in Figure 3d. (b) AFM images of the ZnO NW change with the increase of the applied force.

**Table S1** Sizes and mechanical parameters of the ZnO NWs with small scanning angles.

| No. | $d$ (nm) | $F_f$ (nN) | $F_{th-s}$ (nN) | $\theta$ (°) |
|-----|----------|------------|-----------------|--------------|
| 1   | 67       | 312.5      | 312.5           | 3            |
| 2   | 121      | 1312.5     | 1312.5          | 1            |
| 3   | 165      | 2062.5     | 2062.5          | 2            |
| 4   | 172      | 2312.5     | 2312.5          | 0            |
| 5   | 201      | 2437.5     | 2437.5          | 3            |

**Table S2** Sizes and mechanical parameters of the ZnO NWs with large scanning angles.

| No. | $d$ (nm) | $F_r$ (nN) | $F_{th-s}$ (nN) | $\theta$ (°) | $\mu_2$ |
|-----|----------|------------|-----------------|--------------|---------|
| 1   | 85       | 187.5      | 681.16          | 12           | 16.80   |
| 2   | 92       | 312.5      | 798.18          | 11           | 12.32   |
| 3   | 102      | 312.5      | 965.34          | 16           | 10.60   |
| 4   | 103      | 437.5      | 982.06          | 15           | 7.76    |
| 5   | 105      | 437.5      | 1015.49         | 30           | 4.19    |
| 6   | 120      | 437.5      | 1266.24         | 21           | 7.58    |
| 7   | 120      | 562.5      | 1266.24         | 21           | 5.63    |
| 8   | 150      | 812.5      | 1767.74         | 41           | 2.95    |
